# Supplementary material
Source: MDPI journal article supplement (https://www.mdpi.com/2072-4292/15/18/4542)
Supplement: s1 [file s1]

**Table S1.** Correlation coefficients between the regional mean NDVI and the extreme high temperature indices for different time lags in the North China during 1982–2015.

| Indices | 0 month | 1 month | 2 months | 3 months | Time lag |
|---------|---------|---------|----------|----------|----------|
| TM      | 0.154*  | 0.151*  | 0.197**  | 0.181**  | 2        |
| TXX     | 0.098   | 0.019   | 0.188**  | 0.174*   | 2        |
| TXN     | 0.082   | -0.012  | 0.025    | 0.081    | 0        |
| TNX     | 0.215** | 0.176*  | 0.249    | 0.210    | 2        |
| TNN     | 0.141*  | 0.150*  | 0.070    | 0.140*   | 1        |
| TX90    | -0.022  | -0.042  | 0.118    | 0.156*   | 3        |
| TN90    | 0.122   | 0.179*  | 0.245**  | 0.299**  | 3        |

Note: “\*” denotes that the value passes the significance test at a significance level of 0.05 ( $p < 0.05$ ), and “\*\*” denotes that the value passes the significance test at a significance level of 0.01 ( $p < 0.01$ ).
